# Supplementary material for: Angiotensin II Regulates microRNA-132/-212 in Hypertensive Rats and Humans
Source: PubMed Central journal article supplement (PMC3709727; doi:10.3390/ijms140611190), 2013-05-27
Supplement: ijms-14-11190-s001.pdf [file ijms-14-11190-s001.pdf]

## Supplementary Information

**Figure S1.** qRT-PCR identification of miR-21 in the left ventricle of rats effected with AngII for 10 days. Statistical significance was tested by one-way ANOVA, \*\*  $p < 0.005$ . Values are shown as the mean  $\pm$  SD;  $n = 5-7$ . Reference genes used for normalization; miR-17 and miR-191 (M: 0.356, CV: 0.123).

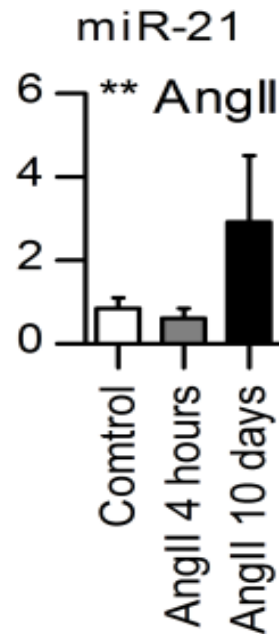

© 2013 by the authors; licensee MDPI, Basel, Switzerland. This article is an open access article distributed under the terms and conditions of the Creative Commons Attribution license (<http://creativecommons.org/licenses/by/3.0/>).
